# Supplementary material
Source: publisher figshare collection journal article supplement (https://acs.figshare.com/ndownloader/files/3802756)
Supplement: Supplementary file 1 [file 3802756]

## Electronic Supporting Information

### Fluorinated Poly(ethylene Glycol) Nanocomposites with Enhanced Thermal Properties

Xiangyu Li<sup>†</sup>, Philip Guerieri<sup>‡</sup>, Wenbo Zhou<sup>‡</sup>, Chuan Huang<sup>†‡</sup>, Michael R. Zachariah\*

Department of Chemical and Biomolecular Engineering and Department of Chemistry and  
Biochemistry, University of Maryland, College Park, MD 20742, USA.

\*Corresponding author: [mrz@umd.edu](mailto:mrz@umd.edu)

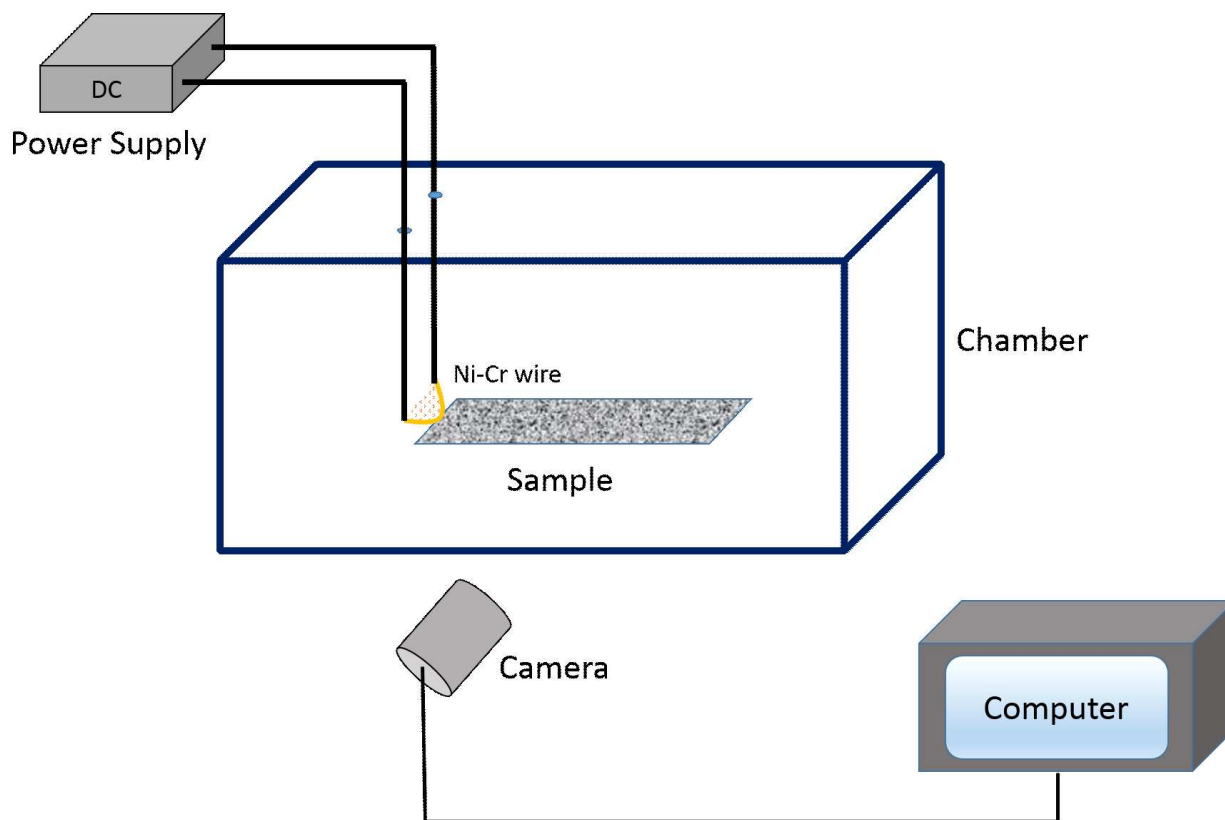

**Figure S1.** Illustration of the combustion test setup.

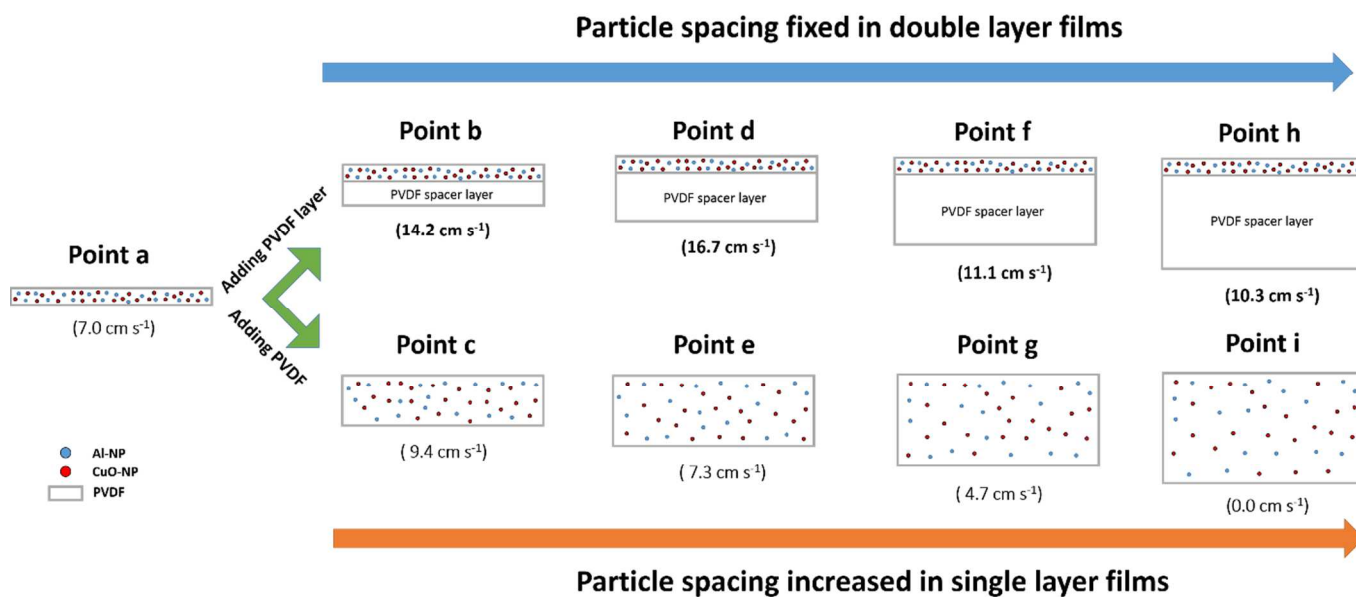

**Figure S2.** Difference of the particle spacing in double layer thermite film and corresponding single layer film.

**Table S1.** Mechanical properties of laminate and single films.

|                                 | Film 1 <sup>*</sup> | Film 2 <sup>*</sup> | Film 3 <sup>*</sup> |
|---------------------------------|---------------------|---------------------|---------------------|
| Tensile Strength (MPa)          | 7.50 ± 0.08         | 12.20 ± 0.12        | 7.60 ± 0.09         |
| Ultimate Strain                 | 0.076 ± 0.007       | 0.58 ± 0.03         | 0.091 ± 0.01        |
| Toughness (MJ m <sup>-3</sup> ) | 0.06 ± 0.01         | 2.24 ± 0.06         | 0.45 ± 0.04         |

\* Film 1: Thermite /PVDF; Film 2: Film 1 with additional PVDF spacer layers to create a 6 layer film, Film 3: Film 2 but with the thermite particles dispersed evenly.

**Table S2.** Performance comparison of 6 layer laminate film with other similar energetic composite.

| Structure                  | Composition<br>(Mass ratio) | Propagation<br>Velocity<br>(cm/s) | Tensile<br>Strength<br>(MPa) | Strain | Toughness<br>(MJ m <sup>-3</sup> ) |
|----------------------------|-----------------------------|-----------------------------------|------------------------------|--------|------------------------------------|
| 6 layers                   | PVDF/Al/CuO<br>=39/26/35    | 9.4 (In Ar)                       | 12.20                        | 0.58   | 2.24                               |
| Single layer <sup>32</sup> | PVDF/Al=50/50               | 8.6 (In Ar)                       | 11.00                        | 0.031  | 0.28                               |
